# Supplementary material
Source: PubMed Central journal article supplement (PMC5763073)
Supplement: mmc1.pdf [file mmc1.pdf]

YMTHE, Volume 26

## **Supplemental Information**

### **Contribution of Implanted, Genetically Modified Muscle Progenitor Cells Expressing BMP-2 to New Bone Formation in a Rat Osseous Defect**

**Rodolfo E. De La Vega, Consuelo Lopez De Padilla, Miguel Trujillo, Nicholas Quirk, Ryan M. Porter, Christopher H. Evans, and Elisabeth Ferreira**

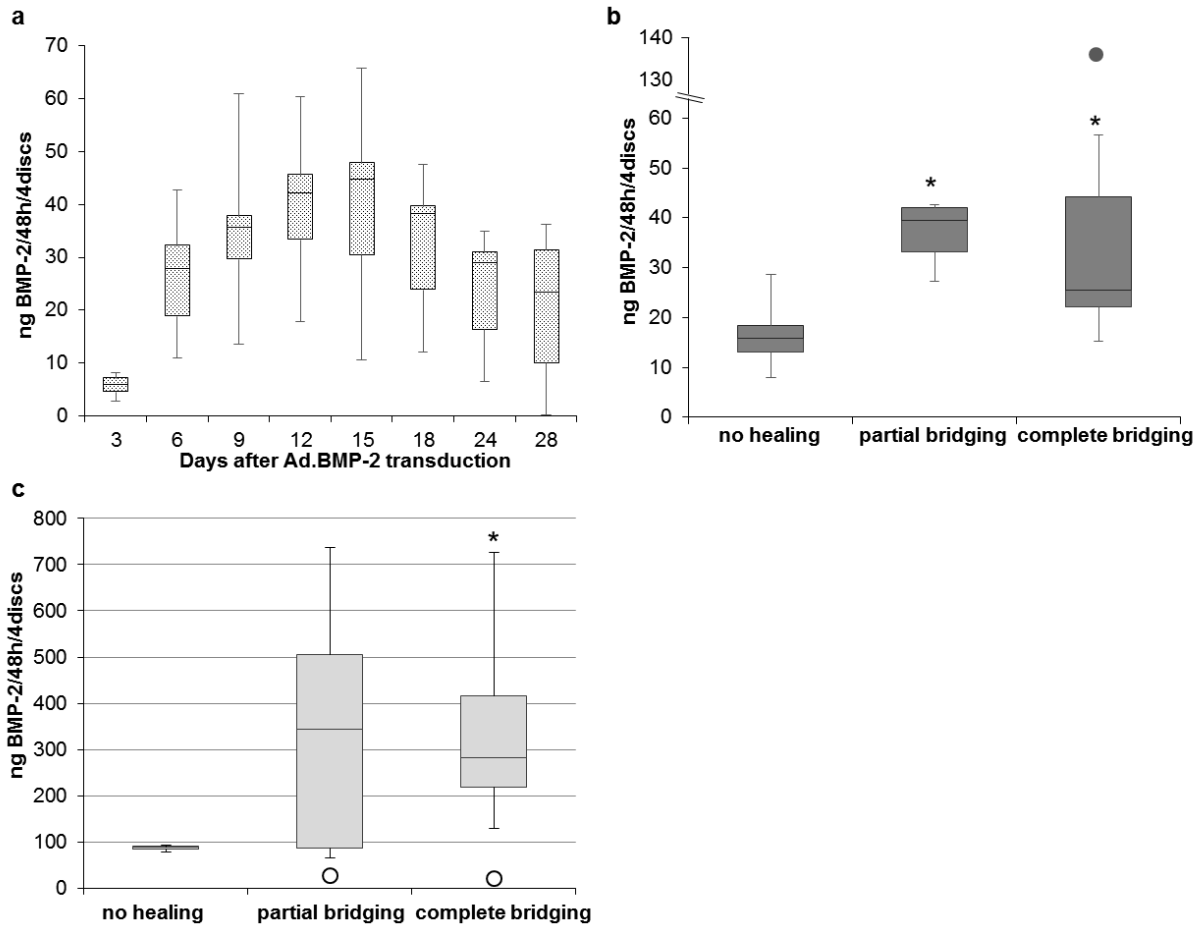

**Figure S1: BMP-2 production by genetically modified rat muscle discs.** BMP-2 was quantified in muscle supernatants using an ELISA kit specific for the human protein. (a) Time course of BMP-2 production *in vitro* by cultures of transduced muscle discs (n=8). (b) BMP-2 secretion by muscle discs at day 3 after Ad.BMP-2 transduction (n>8 per group) correlated to radiographic evaluation of repair 8 weeks after implantation. (c) BMP-2 secretion by muscle discs at the time of implantation (i.e., day 5 after transduction), correlated to radiographic evaluation of repair 8 weeks after implantation. Representative results are shown as box and whisker plots, with median as the horizontal bar, interquartile range calculated using Tukey hinges as the box, and the lowest and highest values represented as whiskers. Circle dots represent outliers. \* denotes a significant difference ( $p < 0.05$ ) compared to the “no healing” group.

| <b>Rat Number</b> | <b>Recipient</b> | <b>FK506 /SEW 2871</b> | <b>BMP-2 secretion (ng/48h/4discs)</b> | <b>Radiologic Bridging</b> |
|-------------------|------------------|------------------------|----------------------------------------|----------------------------|
| 1                 | Wild-type        | +                      | 220.5 ± 14.0                           | Complete                   |
| 2                 | Wild-type        | +                      | 726.2 ± 35.1                           | Complete                   |
| 3                 | Wild-type        | +                      | 219.8 ± 11.4                           | Complete                   |
| 4                 | Wild-type        | +                      | 344.3 ± 16.4                           | Complete                   |
| 5                 | Wild-type        | +                      | 129.3 ± 2.1                            | Complete                   |
| 6                 | Wild-type        | +                      | 415.8 ± 2.4                            | Complete                   |
| 7                 | Wild-type        | +                      | 415.1 ± 16.02                          | Complete                   |
| 8                 | GFP              | -                      | 283.2 ± 33.5                           | Partial                    |
| 9                 | GFP              | -                      | 405.4 ± 51.5                           | Partial                    |
| 10                | GFP              | -                      | 284.6 ± 21.4                           | None (pin loosening)       |
| 11                | GFP              | -                      | 737.7 ± 20.1                           | Partial                    |

**Table S1.** Bridging of femoral defects in wild-type and GFP<sup>+</sup> rats by the implantation of muscle discs from GFP<sup>+</sup> rats expressing BMP-2 in the absence or presence of immunosuppression

| Gene            | Accession number | Primer sequence 5'-3'                                     | Product size (bp) | Primer efficiency |
|-----------------|------------------|-----------------------------------------------------------|-------------------|-------------------|
| Rat GAPDH       | NM<br>017008     | F : GGTCGGTGTGAACGGATTTGG<br>R : GCCGTGGGTAGAGTCATACTGGAC | 148               | 95%               |
| Rat ALP         | NM<br>013059     | F : ATGTCTGGAACCGCACTGAAC<br>R : TTCTTTGTCAGGATCCGGAGG    | 166               | 99%               |
| Rat Runx2       | NM<br>001278483  | F : GCCAGGTTCAACGATCTGAG<br>R : GAGGCGGTCAGAGAACAAC       | 201               | 95%               |
| Rat Col1A1      | NM<br>053304     | F : CTGACTGGAAGAGCGGAGAG<br>R : GAGTGGGGAACACACAGGTC      | 111               | 96%               |
| Rat osteopontin | M99252           | F : AAGCCTGACCCATCTCAGAA<br>R : ATGGCTTTCATTGGAGTTGC      | 114               | 98%               |
| Rat osteocalcin | NM<br>013414     | F : GCATTCTGCCTCTCTGACCT<br>R : GGCTCCAAGTCCATTGTTGA      | 132               | 95%               |
| Rat BMP-2       | NM<br>017178     | F : TAAAGCCTGCCACAGCCAGC<br>R : TGTCCATCGCATCACAGCCG      | 122               | 98%               |
| Human BMP-2     | NM<br>001200     | F : AACACTGTGCGCAGCTTCC<br>R : CTCCGGGTTGTTTTCCAC         | 74                | 96%               |

**Table S2.** List and sequences of primers used for analysis of mRNA expression. Forward (F). Reverse (R).
